# Supplementary material for: The Effect of Guilu Erxian Jiao on Osteoporosis Patients: A Retrospective Study
Source: Research Square preprint supplement (doi:10.21203/rs.3.rs-685272/v1), 2021-07-13
Supplement: Supplementary file 1 [file 59fcd0e436011bea1b9b3646.pdf]

# 長庚醫療財團法人人體試驗倫理委員會

## 臨床試驗變更案同意證明書

地址：105台北市敦化北路199號  
傳真：03-3494549  
聯絡人及電話：蔡宜君(03)3196200#3716  
電子郵件信箱：yijiun@cgmh.org.tw

試驗名稱：龜鹿二仙膠對骨質疏鬆患者的影響-院內資料庫分析

本院案號：201800780B0C501

試驗期間：2018年10月1日~2020年9月30日

本次核准執行期間：2019年7月21日~2019年9月30日

主持人：中醫針傷科 楊宗憲 學術組講師級主治醫師

共同主持人：楊皇煜

執行機構：台北長庚醫院, 林口長庚醫院, 桃園長庚醫院

(1)計畫書：2019.07.02ver.2

(3)受試者同意書：本案經本會同意免除受試者同意書

通過日期：2019年7月21日

期中報告繳交頻率：一年繳交一次

※下次期中報告繳交截止日期：2019年9月30日，為免影響主持人執行研究之權益，請於截止日前兩個月繳交報告(期中報告繳交頻率為三個月者，得於試驗到期前一個月繳交報告)，以利審查作業進行。若主持人未繳交或延遲繳交期中報告，以致本會無法於核准執行期間到期前，核發下次試驗執行期間，所有的研究活動必須停止，包括：對已參與受試者之介入或各項互動，除非本會認為受試者繼續接受試驗介入或參與試驗顯有益於受試者安全或倫理上符合受試者最佳利益之情形，亦不得再納入新個案，直到期中報告核准為止。

本委員會組織與運作皆遵守GCP規定

長庚醫療財團法人  
人體試驗倫理委員會謝燦堂主席

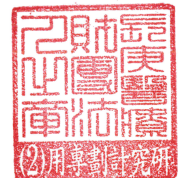

2019 年 07 月 22 日

# Chang Gung Medical Foundation

## Institutional Review Board

199, TUNG HWA NORTH ROAD,

TAIPEI, TAIWAN, 10507

REPUBLIC OF CHINA

Tel: (03) 3196200

Fax: (03) 3494549

Date 2019/07/22

Protocol Title: Therapeutic effect of Kuei-Lu-Er-Xian-Jiao for patients with osteoporosis -CGMH database analysis

IRB No. : 201800780B0C501

Principal Investigator(s): YANG, TSUNG-HSIEN

Co-Investigator(s): YANG-HUANG-YU

Executing Institution: Taipei, Linkou, Taoyuan

Duration of Approval: From 2019/7/21 To 2019/9/30

Approved Protocol: 2019.07.02ver.2

Date of Approval: 2019/07/21

Frequency of Continuing Report: Once a year

※Next Deadline of Continuing Report: 2019/09/30. To facilitate the review, please submit the report two months before the deadline (or one month before the expiration of the trial if a continuing report shall be provided every three months) in order not to influence the principal investigator's right to conduct the research. In the case that failure or delay to submit a continuing report makes the IRB unable to determine the next trial period by the deadline, the trial shall not be continuously conducted. If the Principal Investigator fails to submit a continuing report on time, rendering the Institutional Review Board unable to issue the next trial execution period before the previous trial execution period expires, all research activities, including the intervention or interaction with the participating trial subjects, must be suspended. Unless the Institutional Review Board considers that the continuation of trial intervention or trial participation is greatly beneficial to the trial subject's safety or in the best interest of the trial subject from a moral point of view, no new trial subject shall be included until the continuing report is formally approved.

The IRB is organized and operates in accordance with Good Clinical Practice and the applicable laws and regulations.

A handwritten signature in black ink, appearing to read "T. T. Hsieh". The signature is fluid and cursive, with the first name "T. T." and the last name "Hsieh" clearly distinguishable.

Tsang-Tang Hsieh,MD  
Chairman  
Institutional Review Board  
Chang Gung Medical Foundation

## 【主持人須知】

- 一、 本人負責執行此臨床試驗，依赫爾辛基宣言精神與國內相關法令之規定，確保受試者之權益、健康、個人隱私與尊嚴。
- 二、 計畫執行期間與結束後，皆要求人員確實維護可辨識資料機密性或設計相關機制，並依法規存放年限妥善保存。
- 三、 本人不得洩露因業務知悉之秘密或與研究對象有關之資訊，會善盡保護受試者隱私的義務。隱私(privacy)是指個人私人的範圍，例如年紀、身分證統一編號、婚姻狀態、電話、住址、病史、家族史等，不希望讓他人知道或與他人分享的部分。
- 四、 本人會善盡維護資料機密性的責任，並對於相關資料會有適當安全維護措施。資料機密性(confidentiality)是指個人可辨識資料的管理。
- 五、 實施人體研究計畫前，應擬定研究計畫，經人體試驗倫理委員會審查通過，始得為之。另醫療法所稱之人體試驗案及應用人體生物資料庫檢體進行之案件，尚需經衛生福利部核准，方可進行。人體試驗倫理委員會或主管機關命令中止/終止試驗案件時，不得繼續執行。
- 六、 廠商贊助試驗於執行前，應協助試驗執行醫院完成臨床試驗合約書簽署。合約書簽署流程及注意事項應依本院之「廠商贊助計畫管理作業準則」辦理。展延試驗期間者，經人體試驗倫理委員會同意後，應進行合約變更。
- 七、 試驗進行前，主持人應確實核對試驗計畫書、受試者同意書等之正確版本，以及人體試驗倫理委員會與衛生福利部核准之試驗進行期間；醫療法所稱之人體試驗案，應於本院人體試驗倫理委員會與衛生福利部皆已核准，方可進行；並以人體試驗倫理委員會核准之同意臨床試驗證明迄日為試驗截止日。
- 八、 應完全熟悉試驗藥品/醫療材料、醫療技術在試驗計畫書、最新主持人手冊及其他由試驗委託者提供的相關資訊中描述的使用方法。
- 九、 應明瞭並遵守「醫療法」、「人體試驗管理辦法」、「人體研究法」、「人體生物資料庫管理條例」、「藥品優良臨床試驗準則」、「醫療器材優良臨床試驗準則」等相關法規，以及本院「人體研究暨受試者保護作業管理辦法」、「人體生物資料庫管理辦法」、「研究材料外送作業準則」等之規定，善盡保護受試者之責任，並配合主管機關、人體試驗倫理委員會及執行機構的查核。
- 十、 應確保所有協助臨床試驗的相關人員，對試驗計畫書及試驗藥品/醫療材料、醫療技術有充分的了解，以及他們在臨床試驗中相關的責任和工作，並定期召開會議討論。
- 十一、 試驗主持人應負責所有臨床試驗相關的醫療決定。
- 十二、 在受試者參加試驗與後續追蹤期間，試驗主持人應對受試者任何與試驗相關的不良反應，提供充分的醫療照護，包括重要實驗室檢查值等。當試驗主持人察覺試驗期間受試者有疾病需要醫療照護時，必須告知受試者。
- 十三、 主持人須遵照「嚴重藥物不良反應通報辦法」及「藥品優良臨床試驗準則」、「人體試驗管理辦法」之規定，於時效內向相關單位完成通報。發生非預期且相關之嚴重藥品不良反應，試驗主持人應立即通知人體試驗倫理委員會，如為衛生福利部列管案件，並需確認試驗委託者已通報主管機關；如為主持人自行發起之案件，主持人需通報主管機關。但若試驗計畫書或其他文件明確排除者，不在此限。如為已上市藥品試驗案發生藥品不良反應(ADR)，應依規定至院內網頁之安全通報作業系統完成通報。
- 十四、 試驗主持人應依本院「人體研究暨受試者保護作業管理辦法」規定繳交期中報告及結案報告，未繳者不得再申請新案，針對未於執行期間屆期前取得期中報告續核准，應立即停止研究案之所有程序，案件審議如有必要時須配合於會議列席報告。
- 十五、 受試者同意書使用原則須遵照「藥品優良臨床試驗準則」之規定，若具有重要性之新資訊可能影響受試者之同意時，應修訂受試者同意書及提供受試者之任何其他書面資料，並應立即告知受試者、法定代理人或有同意權之人，並重新取得書面同意。修訂後之受試者同意書及提供受試者之任何其他書面資料，應先得到人體試驗倫理委員會之核准；經主管機關核准進行之臨床試驗，並應得到主管機關之核准。
- 十六、 經人體試驗倫理委員會核准之計畫內容，凡於核准期間內任一變更(包含試驗計畫書、主持人手冊、受試者同意書、問卷、量表、執行院區、計畫主持人、試驗委託者等)，應於執行前送變更案審查，於接獲書面核准函後，始可為之。另計畫主持人因故自行暫停、終止或結案時，應以書面通知本會。
- 十七、 試驗研究團隊執行試驗時發生未遵照審查通過之計畫書、主管機關所訂立之法令規章或本會規定之情事，應遵照本院「人體研究暨受試者保護作業管理辦法」之規定，於時效內完成通報。

- 十八、 人體試驗倫理委員會同意之試驗期間到期，但需要展延試驗期間者，應於有效期限到期前2個月提出申請。
- 十九、 醫療法所稱人體試驗範圍之案件，侵入性檢查或治療，以及使用上市藥品之案件需至『HIS系統-研究計畫-研究計畫申請-臨床試驗執行管控作業』登錄受試者資料。
- 二十、 試驗主持人於門診(住院)時發現受試者發生與試驗相關的不良反應，需轉診時，試驗主持人應主動向受試者及家屬解釋，並協助轉診(會診)，且於病歷(會診單)上詳細記載本試驗目的、副作用、目前受試者病情及處置，並口頭告知轉診主治醫師。
- 二十一、 若為多國多中心之案件，計畫主持人須確認第一個Kit之正確性。
- 二十二、 應遵照「人體試驗管理辦法」、「醫療機構及醫事人員發布醫學新知或研究報告倫理守則」及本院「研究成果發表於報章媒體作業準則」規定，醫療法所稱人體試驗之研究成果須經衛生福利部審核通過後，試驗主持人始得發表。
- 二十三、 因試驗計畫主持人過失造成醫院或他人受損害時，須由計畫主持人負法律責任。
- 二十四、 免除受試者同意後仍會適時提供受試者試驗相關訊息。
- 二十五、 當受試者在納入研究後成為受刑人，主持人得知後應以非預期問題通報本會及試驗委託者。
- 二十六、 試驗團隊於試驗執行時需遵守事項：臨床試驗執行需於病歷記載、於病房收案需向護理人員進行教育訓練及需填寫試驗團隊工作職責分配表、每位計畫主持人執行廠商贊助計畫件數不得超過10件。
- 二十七、 若長庚醫療財團法人人體試驗倫理委員會審定須執行簽署受試者同意書程序，本人承諾遵循所提出之簽署受試者同意書程序，並由本人或授權之團隊成員完整詳細的解說並取得知情同意。計畫執行前，應獲得受試者自願給予之受試者同意書。執行時應確認使用長庚醫療財團法人人體試驗倫理委員會核准之最新用印版本受試者同意書。
- 二十八、 若試驗藥物同時在美國和歐盟進行試驗，依美國或歐盟藥品管理規定，則試驗結果將公佈於公開的臨床試驗資訊網站：Clinicaltrials.gov (美國)，clinicaltrialsregister.eu (歐盟)，所有臨床試驗需在納入第一位受試者前，登記在可供大眾取得的資料庫。
- 二十九、 以上內容經本人確認無誤，若需要願提供所需之相關資料予人體試驗倫理委員會，以提供受試者權益之審查。
- 三十、 其餘未盡事宜，請參照本院「人體研究暨受試者保護作業管理辦法」辦理。

**CHANG GUNG MEDICAL FOUNDATION**

199 TUNG HWA NORTH ROAD

TAIPEI, TAIWAN, 10507

REPUBLIC OF CHINA

TEL(03)3196200

FAX(03)3494549

**Institutional Review Board A**

2019 July - 2020 June

| MEMBER                      | GENDER       | PRIMARY SPECIALTY                               | AFFILIATION OF INSTITUTION                          |
|-----------------------------|--------------|-------------------------------------------------|-----------------------------------------------------|
| 主席：謝燦堂<br>HSIEH, TSANG-TANG | Male<br>男性   | Obstetrics/Gynecology<br>婦產科專科                  | CGMF (Taipei)<br>台北長庚醫院                             |
| 副主席：陳順勝<br>SHUN--SHENG-CHEN | Male<br>男性   | Neurology<br>神經內科專科                             | CGMF (Kaohsiung)<br>高雄長庚醫院                          |
| 醫療執秘：蘇建安<br>SU, JIAN-AN     | Male<br>男性   | Psychiatry<br>精神科專科                             | CGMF (Jiayi)<br>嘉義長庚醫院                              |
| 鄭欽明<br>CHENG, CHIN-MING     | Male<br>男性   | Business Management<br>企業管理                     | Children's Hearing Foundation<br>財團法人雅文兒童聽語文教基金會    |
| 陳益程<br>YI-CHENG CHEN        | Male<br>男性   | Gastroenterology and<br>Hepatology<br>胃腸肝膽科     | CGMF (Taipei)<br>台北長庚醫院                             |
| 傅懋洋<br>FU, MAO-YOUNG        | Male<br>男性   | Cardiology<br>心臟內科專科                            | CGMF (Kaohsiung)<br>高雄長庚醫院                          |
| 郭亮鋒<br>KUO, LIANG-MOU       | Male<br>男性   | General Surgery<br>一般外科專科                       | CGMF (Jiayi)<br>嘉義長庚醫院                              |
| 黃怡婷<br>Yi-Ting Hwang        | Female<br>女性 | Statistics<br>統計                                | National Taipei University<br>國立臺北大學                |
| 張毓翰<br>CHANG, YU-HAN        | Male<br>男性   | Orthopaedic<br>骨科                               | CGMF (Lin-Kou)<br>林口長庚醫院                            |
| 林欣柔<br>SHIN-ROU LIN         | Female<br>女性 | Law<br>法律                                       | Chang Gung University<br>長庚大學                       |
| 陳書毓<br>CHEN, Shu-Yu         | Female<br>女性 | Nursing<br>護理                                   | Changhua Christian Hospital<br>彰化基督教醫院              |
| 王正旭<br>WANG, CHENG-HSU      | Male<br>男性   | Hematology/Oncology<br>腫瘤科專科                    | CGMF (Kee-Lung)<br>基隆長庚醫院                           |
| 曾旭民<br>Hsu-Min Tseng        | Male<br>男性   | Psychology<br>心理學                               | Chang Gung University<br>長庚大學                       |
| 湯依寧<br>I-Ning, TANG         | Female<br>女性 | Physical medicine and<br>rehabilitation<br>復健醫學 | Taiwan center for drug<br>evaluation<br>財團法人醫藥品查驗中心 |
| 游靜宜<br>YU, CHING-YI         | Female<br>女性 | Social Work<br>社工                               | CGMF (Lin-Kou)<br>林口長庚醫院                            |

Chairman:



Tsang-Tang Hsieh, MD
